# Supplementary material for: Chitosan-Hyaluronan Nanoparticles for Vinblastine Sulfate Delivery: Characterization and Internalization Studies on K-562 Cells
Source: MDPI journal article supplement (doi:10.3390/pharmaceutics14050942), 2022-04-26
Supplement: s1 [file s1]

# SUPPLEMENTARY MATERIAL: Chitosan-Hyaluronan Nanoparticles for Vinblastine Sulfate Delivery: Characterization and Internalization Studies on K-562 Cells

Carmela Cannavà <sup>1,†</sup>, Federica De Gaetano <sup>2,†</sup>, Rosanna Stancanelli <sup>2</sup>, Valentina Venuti <sup>3</sup>, Giuseppe Paladini <sup>3,\*</sup>, Francesco Caridi <sup>3</sup>, Corneliu Ghica <sup>4</sup>, Vincenza Crupi <sup>3</sup>, Domenico Majolino <sup>3</sup>, Guido Ferlazzo <sup>1</sup>, Silvana Tommasini <sup>2</sup> and Cinzia A. Ventura <sup>2,\*</sup>

<sup>1</sup> Laboratory of Immunology and Biotherapy, Department of Human Pathology, University of Messina, Via Consolare Valeria, 1, I-98125 Messina, Italy; ccannava@alice.it (C.C.); guido.ferlazzo@unime.it (G.F.)

<sup>2</sup> Department of Chemical, Biological, Pharmaceutical and Environmental Sciences, University of Messina, Viale Ferdinando Stagno D'Alcontres 31, I-98166 Messina, Italy; fedegaetano@unime.it (F.D.G.); rstancanelli@unime.it (R.S.); stommasini@unime.it (S.T.)

<sup>3</sup> Department of Mathematical and Computer Sciences, Physical Sciences and Earth Sciences, University of Messina, Viale Ferdinando Stagno D'Alcontres 31, I-98166 Messina, Italy; vvenuti@unime.it (V.V.); fcaridi@unime.it (F.C.); vcrupi@unime.it (V.C.); dmajolino@unime.it (D.M.)

<sup>4</sup> National Institute of Materials Physics, 405A Atomistilor str., 077125 Magurele-Bucharest, Romania; cghica@infim.ro (C.G.)

\* Correspondence: gpaladini@unime.it (G.P.); caventura@unime.it (C.A.V.); Tel.: +39-090-6765463 (G.P.); +39-090-6766508 (C.A.V.)

† First Author.

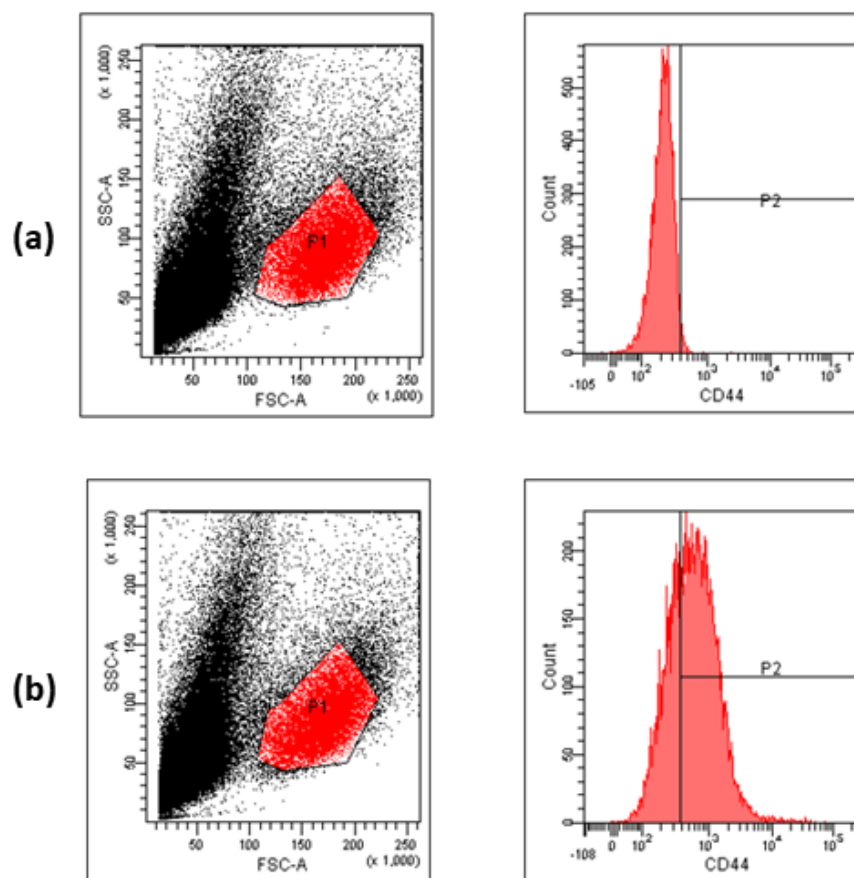

**Figure S1.** Flow cytometry analysis of K-562 cells: (a) isotype control; (b) cells labeled with FITC anti-human CD44 antibody.

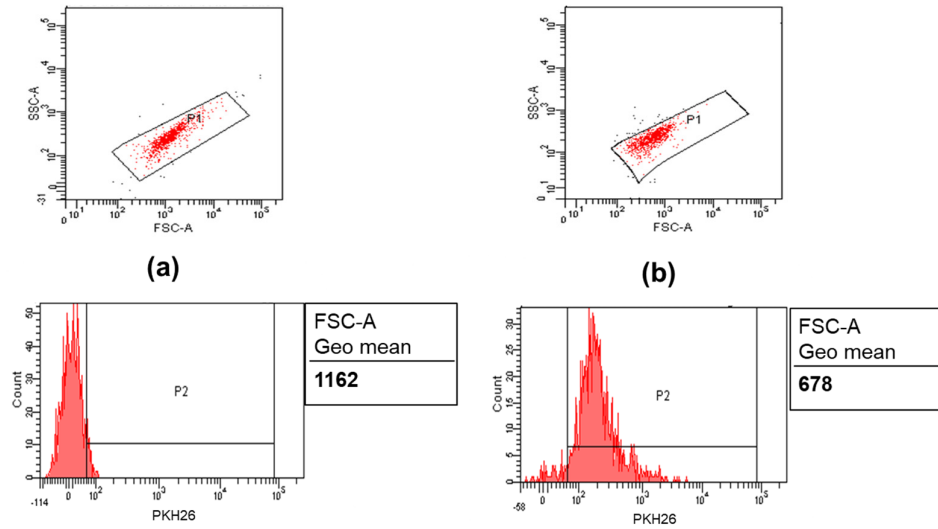

**Figure S2.** Cytofluorimetric control of the labeling of *L. Reuteri* with PKH26 and its lysis by sonication. (a) unlabeled *L. Reuteri*; (b) labeled *L. Reuteri* after four cycles of sonication.

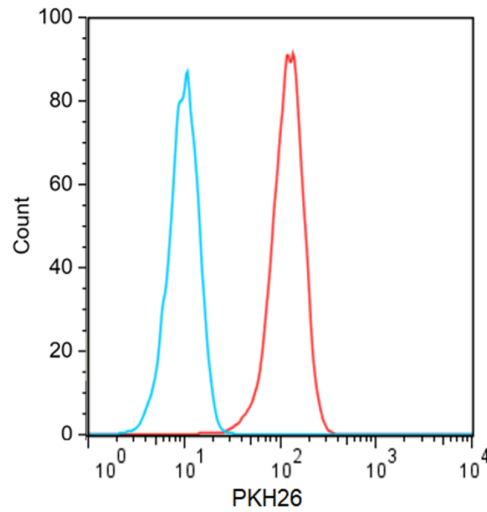

**Figure S3.** Cytofluorimetric analysis of CS/HY NPs loading labeled lysate of *L. Reuteri*. Labeled NPs: red histogram; unlabeled NPs: light blue histogram.
